# Supplementary material
Source: ML conference proceedings conference paper supplement (https://openaccess.thecvf.com/content/WACV2022/html/Gudovskiy_CFLOW-AD_Real-Time_Unsupervised_WACV_2022_paper.html)
Supplement: Supplementary file 1 [file Gudovskiy_CFLOW-AD_Real-Time_Unsupervised_WACV_2022_supplemental.pdf]

# Appendix for CFLOW-AD: Real-Time Unsupervised Anomaly Detection with Localization via Conditional Normalizing Flows

## A. Relationship with the flow framework

The loss function for the *reverse*  $D_{KL} [\hat{p}_Z(\mathbf{z}, \boldsymbol{\theta}) \| p_Z(\mathbf{z})]$  objective [1], where  $\hat{p}_Z(\mathbf{z}, \boldsymbol{\theta})$  is the model prediction and  $p_Z(\mathbf{z})$  is a target density, is defined as

$$\mathcal{L}(\boldsymbol{\theta}) = \mathbb{E}_{\hat{p}_Z(\mathbf{z}, \boldsymbol{\theta})} [\log \hat{p}_Z(\mathbf{z}, \boldsymbol{\theta}) - \log p_Z(\mathbf{z})]. \quad (5)$$

The first term in (5) can be written using (4) definition for a standard MVG prior ( $\mathbf{u} \sim \mathcal{N}(\mathbf{0}, \mathbf{I})$ ) as

$$\log \hat{p}_Z(\mathbf{z}, \boldsymbol{\theta}) = \log(2\pi)^{-D/2} - E^2(\mathbf{u})/2 + \log |\det \mathbf{J}|, \quad (5.1)$$

where  $E^2(\mathbf{u}) = \|\mathbf{u}\|_2^2$  is a squared Euclidean distance of  $\mathbf{u}$ .

Similarly, the second term in (5) can be written for MVG density (2) using a square of Mahalanobis distance as

$$\log p_Z(\mathbf{z}) = \log(2\pi)^{-D/2} + \log \det \boldsymbol{\Sigma}^{-1/2} - M^2(\mathbf{z})/2. \quad (5.2)$$

By substituting (5.1-5.2) into (5), the constants  $\log(2\pi)^{-D/2}$  are eliminated and the loss is

$$\mathcal{L}(\boldsymbol{\theta}) = \mathbb{E}_{\hat{p}_Z(\mathbf{z}, \boldsymbol{\theta})} \left[ \frac{M^2(\mathbf{z}) - E^2(\mathbf{u})}{2} + \log \frac{|\det \mathbf{J}|}{\det \boldsymbol{\Sigma}^{-1/2}} \right]. \quad (6)$$

## B. CFLOW decoders for likelihood estimation

We train CFLOW-AD using a maximum likelihood objective, which is equivalent to minimizing the *forward*  $D_{KL}$  objective [1] with the loss defined by

$$\mathcal{L}(\boldsymbol{\theta}) = D_{KL} [p_Z(\mathbf{z}) \| \hat{p}_Z(\mathbf{z}, \mathbf{c}, \boldsymbol{\theta})], \quad (7)$$

where  $\hat{p}_Z(\mathbf{z}, \mathbf{c}, \boldsymbol{\theta})$  is a conditional normalizing flow (CFLOW) model with a condition vector  $\mathbf{c} \in \mathbb{R}^C$ .

The target density  $p_Z(\mathbf{z})$  is usually replaced by a constant because the parameters  $\boldsymbol{\theta}$  do not depend on this density during gradient-based optimization. Then by analogy with unconditional flow (4), the loss (7) for  $\hat{p}_Z(\mathbf{z}, \mathbf{c}, \boldsymbol{\theta})$  can be written as

$$\mathcal{L}(\boldsymbol{\theta}) = -\mathbb{E}_{p_Z(\mathbf{z})} [\log p_U(\mathbf{u}) + \log |\det \mathbf{J}|] + \text{const}. \quad (7.1)$$

In practice, the expectation operation in (7.1) is replaced by an empirical train dataset  $\mathcal{D}_{\text{train}}$  of size  $N$ . Using the

definition of base distribution with  $p_U(\mathbf{u})$ , the final form of (7) can be expressed as

$$\mathcal{L}(\boldsymbol{\theta}) \approx \frac{1}{N} \sum_{i=1}^N \left[ \frac{\|\mathbf{u}_i\|_2^2}{2} - \log |\det \mathbf{J}_i| \right] + \text{const}, \quad (7.2)$$

where the random variable  $\mathbf{u}_i = g^{-1}(\mathbf{z}_i, \mathbf{c}_i, \boldsymbol{\theta})$  and the Jacobian  $\mathbf{J}_i = \nabla_{\mathbf{z}} g^{-1}(\mathbf{z}_i, \mathbf{c}_i, \boldsymbol{\theta})$  depend both on input features  $\mathbf{z}_i$  and conditional vector  $\mathbf{c}_i$  for CFLOW model.

## References

- [1] George Papamakarios, Eric Nalisnick, Danilo Jimenez Rezende, Shakir Mohamed, and Balaji Lakshminarayanan. Normalizing flows for probabilistic modeling and inference. *Journal of Machine Learning Research*, 2021.
